# Supplementary material for: Global water retention in forest canopy, litter, and soil layers and its controlling factors
Source: Research Square preprint supplement (doi:10.21203/rs.3.rs-337448/v1), 2021-04-19
Supplement: Supplementary file 1 [file 2c4adde03ca25bc11a44118b.docx]

**Identification of studies via Citations**

Records identified from:

Citation searching (n = 3249)

**Identification**

Citations not retrieved

(n = 221)

Citations sought for retrieval

(n = 475)

**Screening**

Citations excluded:

Citations missing key data (n = 175)

Key data in the citations obtained by simulation or prediction (n = 23)

Key data in the citations cannot be

unified or converted (n = 19)

Repetitive citations (n = 4)

Citations assessed for eligibility

(n = 254)

Citations included in review

(n = 254)

Number of observations included in citations (n = 982)

**Included**
